# Supplementary material for: An Analysis of State Autism Educational Assessment Practices and Requirements
Source: Springer Nature journal article supplement (doi:10.1007/s10803-015-2589-0), 2015-09-12
Supplement: MOESM1 [file 7455144]

Appendix A

Supplemental Table of Website Update Dates or Copyright for All States*

| **State** | **Date of Last Update or Copyright** | **State** | **Date of Last Update or Copyright** |
| --- | --- | --- | --- |
| AL | 2014 | MT | 07/06/2015 |
| AK | 2013 | NE | 07/15/2014 |
| AZ | 2015 | NV | July 2011 |
| AR | 2014 | NH | 5/15/2014 |
| CA | 07/24/2014 | NJ | 2013 |
| CO | 5/28/2015 | NM | 12/27/2010 |
| CT | 2015 | NY | 06/25/2015 |
| DC | 2011 | NC | July 2014 |
| DE | 12/5/2014 | ND | February 2013 |
| FL | 2015 | OH | 07/01/2014 |
| GE | 2015 | OK | December 2012 |
| HA | Not found | OR | 01/03/2014 |
| ID | Not found | PE | 2015 |
| IL | Not found | RI | 09/09/2013 |
| IN | 7/9/2015 | SC | 2011 |
| IA | 3/25/2013 | SD | 7/31/2013 |
| KS | August 2012 | TN | 4/5/2013 |
| KY | 7/1/2015 | TX | 2015 |
| LO | Not found | UT | 2014 |
| ME | 7/19/2015 | VT | 2014 |
| MD | August 2009 | VA | 2012 |
| MA | 03/13/2015 | WA | 2010 |
| MI | Not found | WV | Not found |
| MN | 10/12/12 | WI | Not found |
| MS | September 2013 | WY | 2015 |
| MO | Not found |  |  |

* We provided the date of last update when provided. If the date of last update was not located, then we listed the copyright data on the website. If neither was found we list “not found.”
